# Supplementary material for: Global High-Resolution Drought Indices for 1981–2022
Source: Copernicus journal article supplement (doi:10.5194/essd-2023-276), 2023-07-28
Supplement: Supplementary file 1 [file essd-2023-276-supplement-version1.pdf]

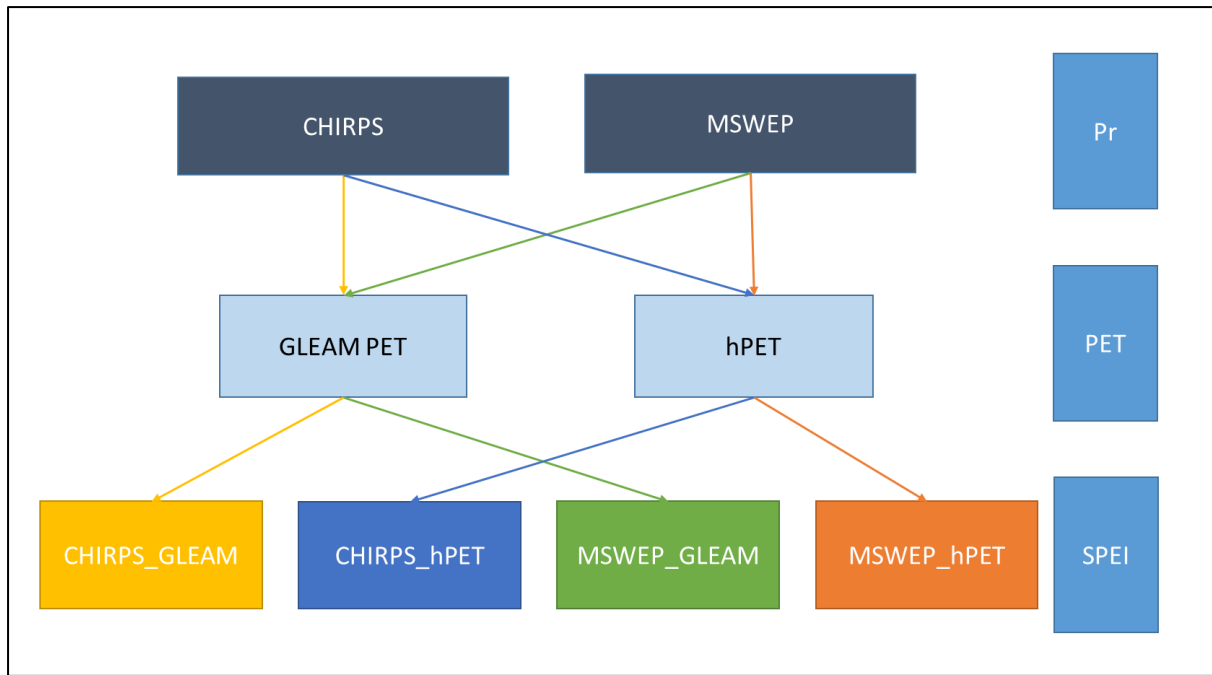

Figure S1. Overview of the input precipitation (Pr) and potential evapotranspiration (PET) and output SPEI.

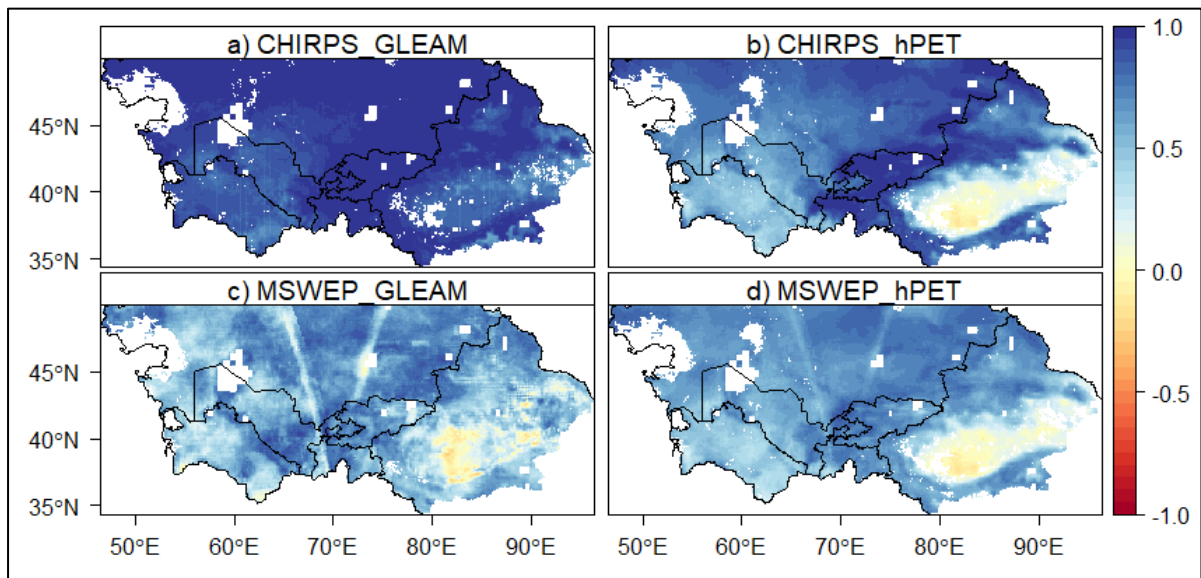

Figure S2. Temporal correlation between the new high-resolution SPEI (SPEI-HR) based on (a) CHIRPS\_GLEAM, (b) CHIRPS\_hPET, (c) MSWEP-GLEAM, and (d) MSWEP-hPET, and Central Asia SPEI (CA-SPEI) for SPEI-1 month during the period 1981–2018.

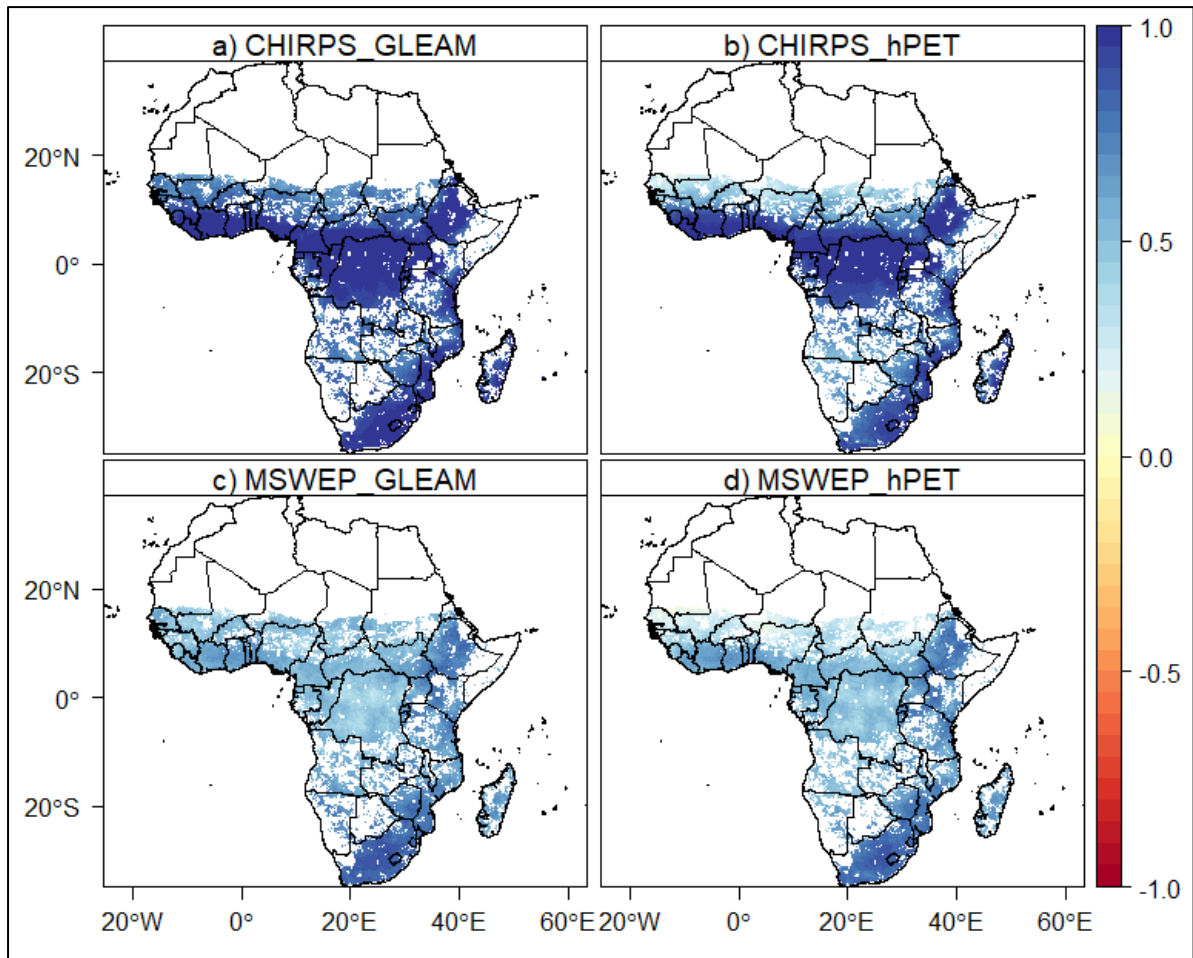

Figure S3. Temporal correlation between the new high-resolution SPEI (SPEI-HR) based on (a) CHIRPS\_GLEAM, (b) CHIRPS\_hPET, (c) MSWEP-GLEAM, and (d) MSWEP-hPET, and Pan African SPEI (AF-SPEI) for SPEI-1 month during the period 1981–2016.
