# Supplementary material for: Global High-Resolution Drought Indices for 1981–2022
Source: Copernicus journal article supplement (doi:10.5194/essd-2023-276), 2023-07-28
Supplement: Supplementary file [file essd-2023-276-AC3-supplement.pdf]

## Reply to Referee #1

We appreciate the reviewer for dedicating their time and providing valuable, detailed feedback. We have diligently addressed all of the comments and discussed them as follows.

This manuscript released the global 5km drought indices for 1981-2022. This is a very meaningful work because it is a high-resolution dataset of drought. However, some other problems in the manuscript are still concerned in the following:

### Authors' response:

- Thank you for recognizing our efforts and providing feedback.

1. In Figure 5, I suggest the authors to replace (e) with North America.

### Authors' response:

- Thank you. Figure 5e is updated as recommended.

2. A flow chart of generating this dataset could help the future readers.

### Authors' response:

- Thank you for the recommendation. We have included a textual explanation of the workflow in the methodology section and have also added a flowchart in the supplementary materials to balance the number of figures

3. More details on the method should be exposed.

### Authors' response:

- Thank you for your valuable recommendation. We have enhanced the methodology section by incorporating a flowchart and providing a detailed explanation of the steps used in developing the datasets, including the selection of log-logistic probability distribution.

4. One advantage of this dataset is high resolution. Therefore, the examples of spatial details could be shown and compared with other datasets.

### Authors' response:

- We also considered this a valuable suggestion, thanks to the reviewer's recommendation. As a result, we have incorporated two high-resolution datasets into the evaluation for Central Asia and Africa (see the attached figures). Both the African and Central Asian datasets have been derived from CHIRPS data and exhibit a very high correlation when compared to MSWEP.

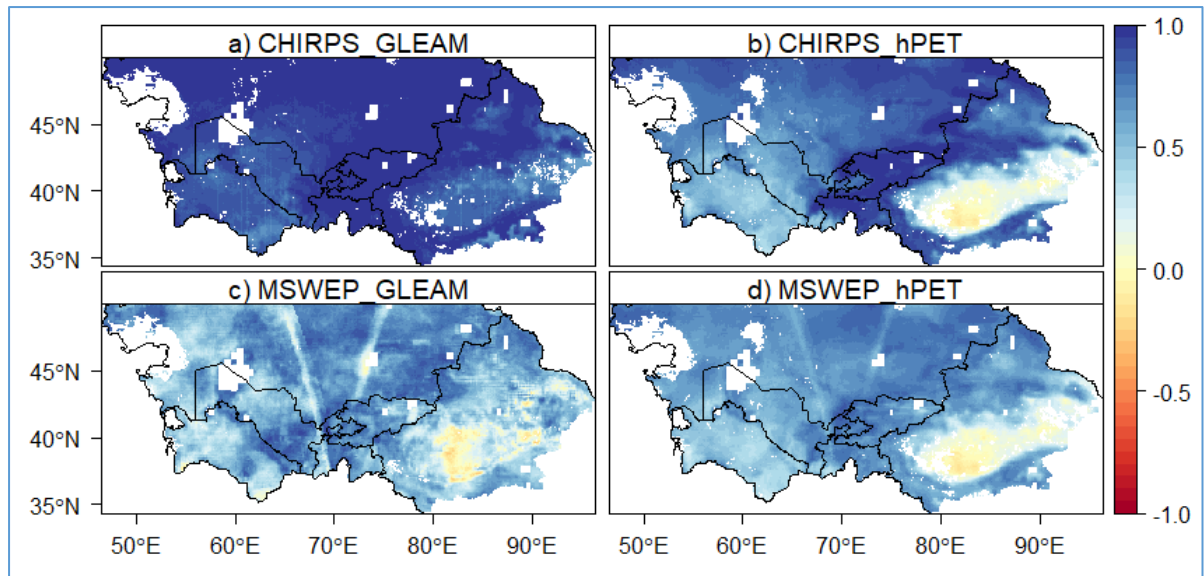

Figure. Correlation between the new high resolutions SPEI (SPEI-HR) based on (a) CHIRPS\_GLEAM, b) CHIRPS\_hPET, c) MSWEP-GLEAM, and d) MSWEP-hPET and Central Asia’s high resolution SPEI dataset (Pyarali et al., 2022) for SPEI-1month for the period 1981–2018.

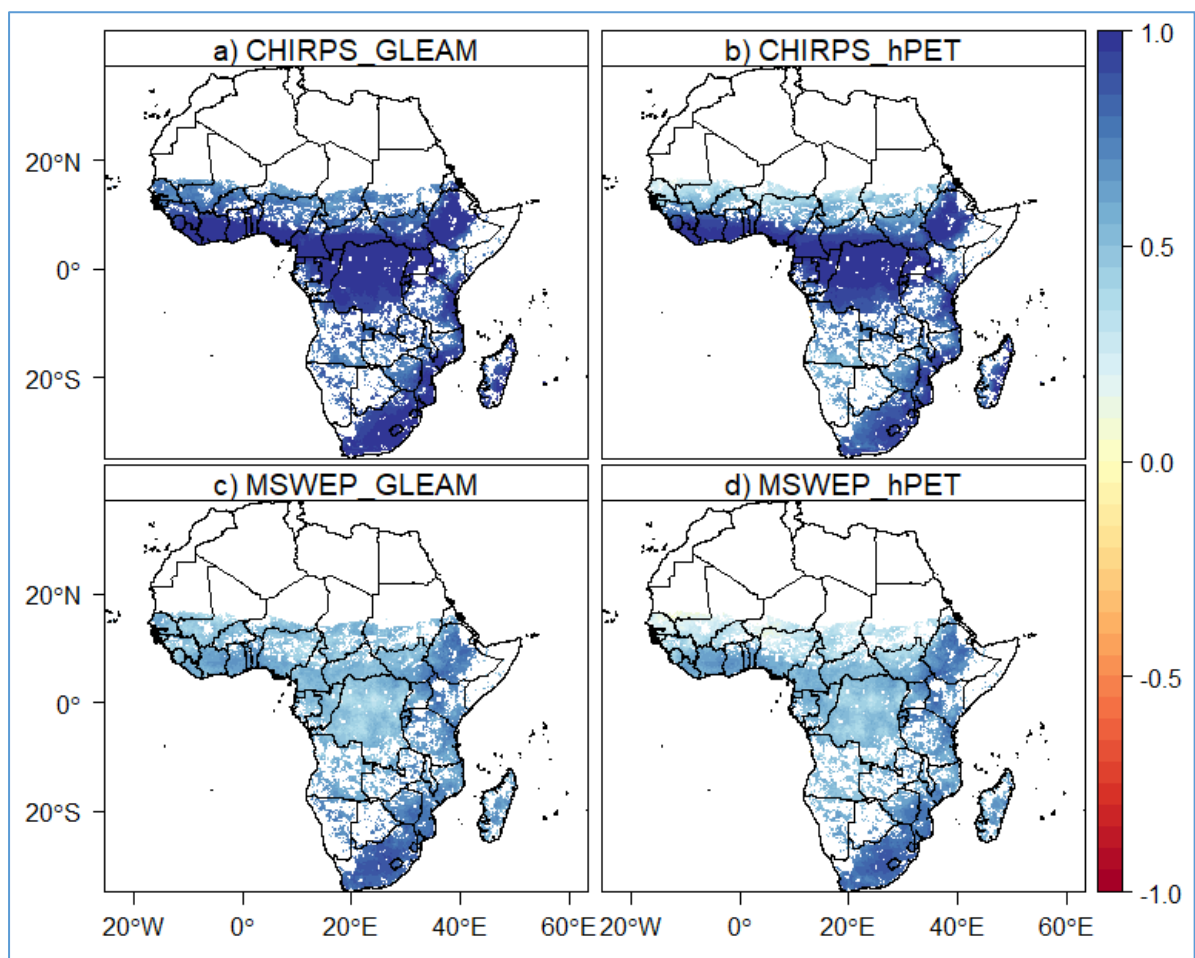

Figure. Correlation between the new high resolutions SPEI (SPEI-HR) based on (a) CHIRPS\_GLEAM, b) CHIRPS\_hPET, c) MSWEP-GLEAM, and d) MSWEP-hPET and the Pan African high resolution (0.05°) SPEI dataset (Peng et al., 2020) for SPEI-1month for the period 1981–2016.

5. The organization of this manuscript should be added to the end of the introduction.

Authors' response:

- Thank you. Based on your recommendation we have added the organization of the manuscript at the end of the introduction as: “The manuscript provides a detailed description of the datasets used and the methods in Section 2. Section 3 presents a thorough analysis of the results and offers a discussion of these results. The availability, including links to the newly developed high-resolution datasets, is described in Section 4, while Section 5 provides a clear conclusion of the work.”

## Reference

Peng, J., Dadson, S., Hirpa, F., Dyer, E., Lees, T., Miralles, D. G., Vicente-Serrano, S. M., and Funk, C.: A pan-African high-resolution drought index dataset, *Earth System Science Data*, 12, 753–769, <https://doi.org/10.5194/essd-12-753-2020>, 2020.

Pyarali, K., Peng, J., Disse, M., and Tuo, Y.: Development and application of high resolution SPEI drought dataset for Central Asia, *Sci Data*, 9, 172, <https://doi.org/10.1038/s41597-022-01279-5>, 2022.
